# Supplementary material for: Effect of Different Substrates, and Irrigation with Water with Different Saline Concentrations, on the Development of Tomato Fungal Diseases in an Almería-Type Greenhouse
Source: MDPI journal article supplement (doi:10.3390/agronomy12051050), 2022-04-27
Supplement: s1 [file s1]

# **Effect of Different Substrates, and Irrigation with Water with Different Saline Concentrations, on the Development of Tomato Fungal Diseases in an Almería-Type Greenhouse**

**Eugenio Ávalos-Sánchez, Alejandro López-Martínez \*, Francisco D. Molina-Aiz, Juan Reca, Patricia Marín-Membrive and Diego L. Valera-Martínez**

Research Centre CIAIMBITAL, University of Almería, Ctra. de Sacramento s/n,  
04120 Almería, Spain; oinegeu@gmail.com (E.Á.-S.);  
fmolina@ual.es (F.D.M.-A.); jreca@ual.es (J.R.); patriciamarin@ual.es (P.M.-M.);  
dvalera@ual.es (D.L.V.-M.)

\* Correspondence: alexlopez@ual.es

**Table S1.** Percentage of infection of *Fusarium* crown and root rot in different moment of the trial.

| Treatment | <i>Fusarium</i> crown and root rot ( <i>Fusarium oxysporum</i> f. sp. <i>radicis-lycopersici</i> ) |                           |                           |
|-----------|----------------------------------------------------------------------------------------------------|---------------------------|---------------------------|
|           | 30/01/2021                                                                                         | 13/02/2021                | 14/03/2021                |
| T1-S      | 1.30 ± 2.41 <sup>a</sup>                                                                           | 2.00 ± 3.00 <sup>a</sup>  | 8.67 ± 3.21 <sup>a</sup>  |
| T2-S      | 0.67 ± 2.41 <sup>a</sup>                                                                           | 2.00 ± 3.00 <sup>a</sup>  | 6.00 ± 3.21 <sup>a</sup>  |
| T3-S      | 2.67 ± 2.41 <sup>a</sup>                                                                           | 5.33 ± 3.00 <sup>a</sup>  | 11.33 ± 3.21 <sup>a</sup> |
| T1-H      | 22.00 ± 2.41 <sup>c</sup>                                                                          | 40.67 ± 3.00 <sup>b</sup> | 63.33 ± 3.21 <sup>b</sup> |
| T2-H      | 15.67 ± 2.41 <sup>b</sup>                                                                          | 36.67 ± 3.00 <sup>b</sup> | 64.67 ± 3.21 <sup>b</sup> |
| T3-H      | 22.67 ± 2.41 <sup>c</sup>                                                                          | 41.33 ± 3.00 <sup>b</sup> | 66.67 ± 3.21 <sup>b</sup> |

T1-S, 0.6 dS m<sup>-1</sup> CE irrigation water + 1.6 dS m<sup>-1</sup> CE fertilization in typical soil substrate “enarenado”; T2-S, 1 dS m<sup>-1</sup> CE irrigation water + 1 dS m<sup>-1</sup> CE fertilization in typical soil substrate “enarenado”; T3-S, 3 dS m<sup>-1</sup> CE irrigation water + 0.5 dS m<sup>-1</sup> CE fertilization in typical soil substrate “enarenado”; T1-H, 0.6 dS m<sup>-1</sup> CE irrigation water + 1.6 dS m<sup>-1</sup> CE fertilization in coconut fiber substrate; T2-H, 1 dS m<sup>-1</sup> CE irrigation water + 1 dS m<sup>-1</sup> CE fertilization in coconut fiber substrate; T3-H, 3 dS m<sup>-1</sup> CE irrigation water + 0.5 dS m<sup>-1</sup> CE fertilization in coconut fiber substrate. Values with different letters in the same column show statistically significant differences with a confidence level of 95.0% ( $p$ -value ≤ 0.05).

**Table S2.** Percentage of infection of Powdery mildew in different moment of the trial.

| Treatment | Powdery mildew ( <i>Leveillula taurica</i> ) |                           |                            |
|-----------|----------------------------------------------|---------------------------|----------------------------|
|           | 30/01/2021                                   | 01/03/2021                | 14/03/2021                 |
| T1-S      | 20.69 ± 2.39 <sup>bc</sup>                   | 10.25 ± 0.99 <sup>b</sup> | 21.27 ± 1.84 <sup>b</sup>  |
| T2-S      | 20.11 ± 2.39 <sup>ab</sup>                   | 7.04 ± 0.99 <sup>a</sup>  | 14.14 ± 1.84 <sup>a</sup>  |
| T3-S      | 14.01 ± 2.39 <sup>a</sup>                    | 7.40 ± 0.99 <sup>a</sup>  | 11.79 ± 1.84 <sup>a</sup>  |
| T1-H      | 27.09 ± 2.39 <sup>cd</sup>                   | 8.63 ± 0.99 <sup>ab</sup> | 22.42 ± 1.84 <sup>b</sup>  |
| T2-H      | 29.24 ± 2.39 <sup>d</sup>                    | 14.55 ± 0.99 <sup>c</sup> | 28.25 ± 1.84 <sup>c</sup>  |
| T3-H      | 31.22 ± 2.39 <sup>d</sup>                    | 13.15 ± 0.99 <sup>c</sup> | 25.07 ± 1.84 <sup>bc</sup> |

T1-S, 0.6 dS m<sup>-1</sup> CE irrigation water + 1.6 dS m<sup>-1</sup> CE fertilization in typical soil substrate “enarenado”; T2-S, 1 dS m<sup>-1</sup> CE irrigation water + 1 dS m<sup>-1</sup> CE fertilization in typical soil substrate “enarenado”; T3-S, 3 dS m<sup>-1</sup> CE irrigation water + 0.5 dS m<sup>-1</sup> CE fertilization in typical soil sub-strate “enarenado”; T1-H, 0.6 dS m<sup>-1</sup> CE irrigation water + 1.6 dS m<sup>-1</sup> CE fertilization in coconut fiber substrate; T2-H, 1 dS m<sup>-1</sup> CE irrigation water + 1 dS m<sup>-1</sup> CE fertilization in coconut fiber substrate; T3-H, 3 dS m<sup>-1</sup> CE irrigation water + 0.5 dS m<sup>-1</sup> CE fertilization in coconut fiber substrate. Values with different letters in the same column show statistically significant differences with a confidence level of 95.0% ( $p$ -value ≤ 0.05).

**Table S3.** Percentage of no marketable yield in harvest moments.

| Greenhouse Irrigation | Production no marketable (%) |                         |                          |                           |                          |
|-----------------------|------------------------------|-------------------------|--------------------------|---------------------------|--------------------------|
|                       | 13/01/2021                   | 08/02/2021              | 18/02/2021               | 09/03/2021                | Total                    |
| T1-S                  | 6.8 ± 2.6 <sup>a</sup>       | 6.8 ± 4.3 <sup>a</sup>  | 28.9 ± 9.3 <sup>ab</sup> | 14.4 ± 13.6 <sup>a</sup>  | 23.2 ± 2.6 <sup>a</sup>  |
| T2-S                  | 10.9 ± 2.6 <sup>ab</sup>     | 35.1 ± 4.3 <sup>b</sup> | 22.5 ± 9.3 <sup>ab</sup> | 23.6 ± 13.6 <sup>ab</sup> | 24.6 ± 2.6 <sup>ab</sup> |
| T3-S                  | 12.6 ± 2.6 <sup>ab</sup>     | 23.3 ± 4.3 <sup>b</sup> | 26.0 ± 9.3 <sup>ab</sup> | 25.2 ± 13.6 <sup>ab</sup> | 21.2 ± 2.6 <sup>a</sup>  |
| T1-H                  | 21.7 ± 2.6 <sup>c</sup>      | 35.5 ± 4.3 <sup>b</sup> | 46.2 ± 9.3 <sup>b</sup>  | 36.2 ± 13.6 <sup>ab</sup> | 32.5 ± 2.6 <sup>b</sup>  |
| T2-H                  | 10.6 ± 2.6 <sup>ab</sup>     | 32.5 ± 4.3 <sup>b</sup> | 28.1 ± 9.3 <sup>ab</sup> | 60.4 ± 13.6 <sup>bc</sup> | 28.8 ± 2.6 <sup>ab</sup> |
| T3-H                  | 15.9 ± 2.6 <sup>bc</sup>     | 23.9 ± 4.3 <sup>b</sup> | 14.4 ± 9.3 <sup>a</sup>  | 96.2 ± 13.6 <sup>c</sup>  | 21.4 ± 2.6 <sup>a</sup>  |

T1-S, 0.6 dS m<sup>-1</sup> CE irrigation water + 1.6 dS m<sup>-1</sup> CE fertilization in typical soil substrate “enarenado”; T2-S, 1 dS m<sup>-1</sup> CE irrigation water + 1 dS m<sup>-1</sup> CE fertilization in typical soil substrate “enarenado”; T3-S, 3 dS m<sup>-1</sup> CE irrigation water + 0.5 dS m<sup>-1</sup> CE fertilization in typical soil substrate “enarenado”; T1-H, 0.6 dS m<sup>-1</sup> CE irrigation water + 1.6 dS m<sup>-1</sup> CE fertilization in coconut fiber substrate; T2-H, 1 dS m<sup>-1</sup> CE irrigation water + 1 dS m<sup>-1</sup> CE fertilization in coconut fiber substrate; T3-H, 3 dS m<sup>-1</sup> CE irrigation water + 0.5 dS m<sup>-1</sup> CE fertilization in coconut fiber substrate. Values with different letters in the same column show statistically significant differences with a confidence level of 95.0% ( $p$ -value ≤ 0.05).

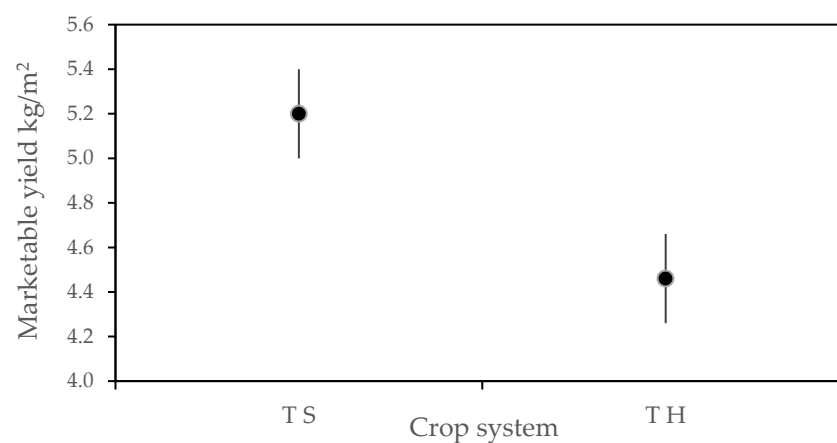

**Figure S1.** Comparison of the total marketable yield means and 95% percent LSD differences for Coconut Substrate treatment (TH) grouping all the treatments and Soil treatment (TS) grouping all the treatments.

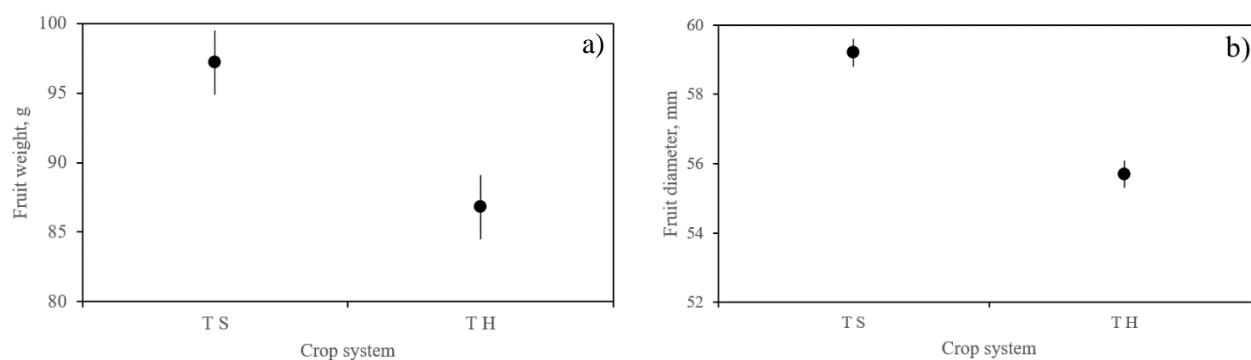

**Figure S2.** Comparison of the Fruit weight (a) and diameter (b) means and 95% percent LSD differences for Coconut Substrate treatment (TH) and Soil treatment (TS).
